# Supplementary material for: Lin28 Inhibits the Differentiation from Mouse Embryonic Stem Cells to Glial Lineage Cells through Upregulation of Yap1
Source: Stem Cells Int. 2021 Feb 22;2021:6674283. doi: 10.1155/2021/6674283 (PMC7920735; doi:10.1155/2021/6674283)
Supplement: Supplementary Materials — Supplementary Table 1: oligo sequences of primers used in this paper. Supplementary Table 2: antibody list used in this paper. Supplementary Figure S1: (a) phase-contrast microscopy of shNC and Lin28a stable knockdown mouse ESCs grown under 2i + LIF medium. Scale bar, 200 μm. (b) Western blot analyses of total proteins from shNC and Lin28a stable knockdown mouse ESCs using the indicated antibodies. (c) qRT-PCR to examine the mRNA level of Lin28a, Yap1, Ctgf, and lineage-specific gene expression in shNC and Lin28a stable knockdown mouse ESCs. The data are shown as the mean ± S.D (n = 3). Statistically significant differences were indicated (∗, P < 0.05 and ∗∗, P < 0.01). Supplementary Figure S2: Ctrl and Lin28-Flag overexpressed mouse ES cells were used to do Flag immunoprecipitation (Flag-IP), and RNA samples extracted from IP complexes were reverse-transcripted to generate cDNAs, followed by qPCR using the following gene primers. mRNA levels present in Lin28-Flag overexpressed mouse ES cells relative to control are shown. Each bar represents mean ± S.D (n = 3). [file 6674283.f1.zip]

Archive with 3 entries (3 files):
- supplementary figures.zip
- Supplementary Table 1.docx
- Supplementary Table 2.docx
